# Supplementary material
Source: ML conference proceedings conference paper supplement (https://proceedings.neurips.cc/paper_files/paper/2023/hash/9ee3ed2dd656402f954ef9dc37e39f48-Abstract.html)
Supplement: Supplementary file 1 [file 9ee3ed2dd656402f954ef9dc37e39f48-Supplemental-Datasets_and_Benchmarks.pdf]

## 1 A Supplementary Material

2 In the Supplementary Material we:

- 3 • Provide a detailed description of the dataset following the “datasheet for datasets” [1].
- 4 • Provide the details for the deep learning models that were used in the paper.

### 5 A.1 Dataset Description

6 This subsection provides a detailed description of the dataset, providing the Motivation, Composition,  
7 Collection Process, Preprocessing, Uses, Distribution, and Maintenance, which are the key stages of  
8 the dataset lifecycle.

#### 9 A.1.1 Motivation

10 Mesogeos is created to enable the development of data-driven wildfire modeling in the Mediterranean.  
11 Wildfires are one of the most threatening natural phenomena and their impact is expected to aggravate  
12 even more due to climate change. While several physical models are used in various fire-related  
13 applications, they do not have the capabilities to model the complex interactions between the different  
14 fire drivers, like the data-driven models. However, the lack of comprehensive datasets hinders the  
15 widespread adoption of data-driven modeling in wildfire-related applications. Besides, even the  
16 existing datasets in the domain are restricted to a specific ML application. Thus, Mesogeos is  
17 introduced as a multi-purpose dataset that can be used for the development of several applications.  
18 Moreover, it covers the Mediterranean, one of the most fire-prone regions on Earth, where no other  
19 wildfire-related datasets are available.

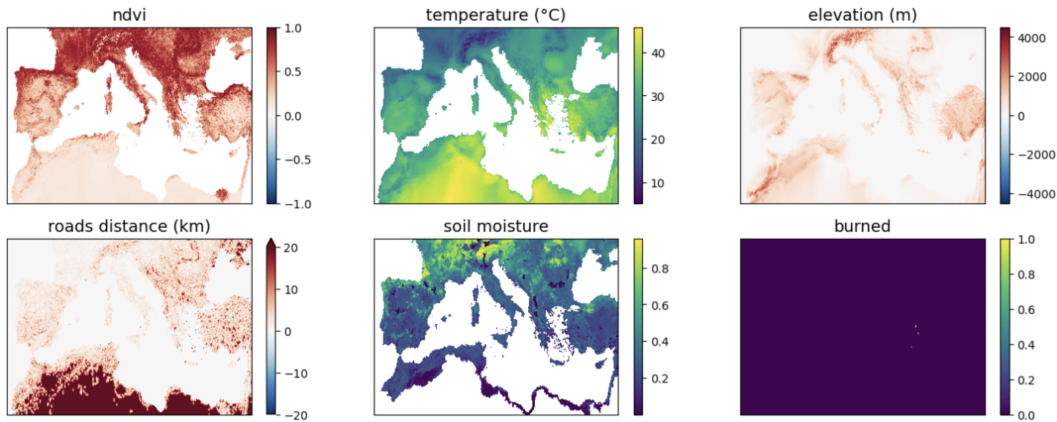

Figure 1: Visualization of some of the variables in Mesogeos datacube for a day.

20 Mesogeos was developed by the Orion Lab of the Institute for Astronomy, Astrophysics, Space  
21 Applications, and Remote Sensing of the National Observatory of Athens in collaboration with  
22 the Image Processing Laboratory (IPL) of the University of Valencia. This work has received  
23 funding from the European Union’s Horizon 2020 Research and Innovation Projects DeepCube and  
24 TREEADS, under Grant Agreement Numbers 101004188 and 101036926 respectively.

#### 25 A.1.2 Composition

26 The Mesogeos dataset is structured in a spatio-temporal grid format, namely a datacube with three  
27 dimensions: longitude, latitude, and time. The datacube encompasses 27 variables related to known  
28 fire drivers such as meteorology, vegetation, land cover, and human activity. Mesogeos also includes  
29 historical burned areas, ignitions, and burned area sizes as separate variables. It has  $1km \times 1km \times$   
30 *daily* resolution and contains the values of the variables covering the period from 2006 to 2022. It

31 incorporates data from the wide Mediterranean area and spans a total area of  $4714km \times 1753km$   
 32 and 6026 days, for a total of 47.796.706.692 different data points for each dynamic variable.

33 The detailed list of the variables with their input sources, original temporal and spatial resolution, and  
 34 their units are provided in Table 1.

35 We present a visualization of some of the variables in the datacube for a day in Figure 1.

Table 1: Table of all the variables in Mesogeos.

| Variable                                      | Source         | Sp. Res. | Temp. Res. | Units         |
|-----------------------------------------------|----------------|----------|------------|---------------|
| <i>Dynamic variables</i>                      |                |          |            |               |
| Max Temperature                               | ERA5-Land      | 9km      | hourly     | K             |
| Max Wind Speed                                | ERA5-Land      | 9km      | hourly     | m/s           |
| Max Wind Direction                            | ERA5-Land      | 9km      | hourly     | °             |
| Max Dewpoint Temperature                      | ERA5-Land      | 9km      | hourly     | K             |
| Max Surface Pressure                          | ERA5-Land      | 9km      | hourly     | Pa            |
| Min Relative Humidity                         | ERA5-Land      | 9km      | hourly     | %/100         |
| Total Precipitation                           | ERA5-Land      | 9km      | hourly     | m             |
| Mean Surface Solar Radiation Downwards        | ERA5-Land      | 9km      | hourly     | $J/m^2$       |
| Day Land Surface Temperature                  | MODIS          | 1km      | daily      | K             |
| Night Land Surface Temperature                | MODIS          | 1km      | daily      | K             |
| Normalized Difference Vegetation Index (NDVI) | MODIS          | 500m     | 16-days    | -             |
| Leaf Area Index (LAI)                         | MODIS          | 500m     | 8-days     | -             |
| Soil moisture                                 | EDO            | 5km      | 10-days    | -             |
| Burned Areas                                  | EFFIS          | 1km      | vector     | {0, 1}        |
| Ignition Points                               | MODIS          | 1km      | vector     | hectares      |
| <i>Semi-static variables</i>                  |                |          |            |               |
| Population                                    | Worldpop       | 1km      | yearly     | $people/km^2$ |
| Fraction of agriculture                       | Copernicus CCS | 300m     | yearly     | %/100         |
| Fraction of forest                            | Copernicus CCS | 300m     | yearly     | %/100         |
| Fraction of grassland                         | Copernicus CCS | 300m     | yearly     | %/100         |
| Fraction of settlements                       | Copernicus CCS | 300m     | yearly     | %/100         |
| Fraction of shrubland                         | Copernicus CCS | 300m     | yearly     | %/100         |
| Fraction of sparse vegetation                 | Copernicus CCS | 300m     | yearly     | %/100         |
| Fraction of water bodies                      | Copernicus CCS | 300m     | yearly     | %/100         |
| Fraction of wetland                           | Copernicus CCS | 300m     | yearly     | %/100         |
| <i>Static variables</i>                       |                |          |            |               |
| Roads distance                                | Worldpop       | 1km      | static     | km            |
| Elevation                                     | COP-DEM        | 30m      | static     | m             |
| Slope                                         | COP-DEM        | 30m      | static     | rad           |
| Aspect                                        | COP-DEM        | 30m      | static     | °             |
| Curvature                                     | COP-DEM        | 30m      | static     | rad           |

36 Mesogeos inherits inaccuracies of the original data sources. Many of the data come from satellites (e.g.  
 37 burned areas and fire ignitions, land surface temperature (LST), NDVI, LAI. Thus satellites' spatial  
 38 resolution and missing data from cloud cover cascade to the datacube. Moreover, due to satellites'  
 39 unavailability for specific days, there are some data missing for the LST MODIS product that was  
 40 replaced by the values of the previous days (172nd of 2006, 190th of 2015, 265th of 2021, 344th of  
 41 2019, 85th of 2017, 169th of 2019, the dates are in Julian date format). The same holds for the 233rd  
 42 day of 2019 for the LAI product. Moreover, the burned areas dataset provided by EFFIS does not  
 43 offer the same coverage of burned areas across all Mediterranean countries throughout the specified  
 44 timeframe, resulting in the absence of data for certain countries in specific years. The distribution  
 45 in the years from the EFFIS product is provided in Figure 2. However, EFFIS is continuously  
 46 post-processing fires from the countries spanning in the past, thus when they are made available, our

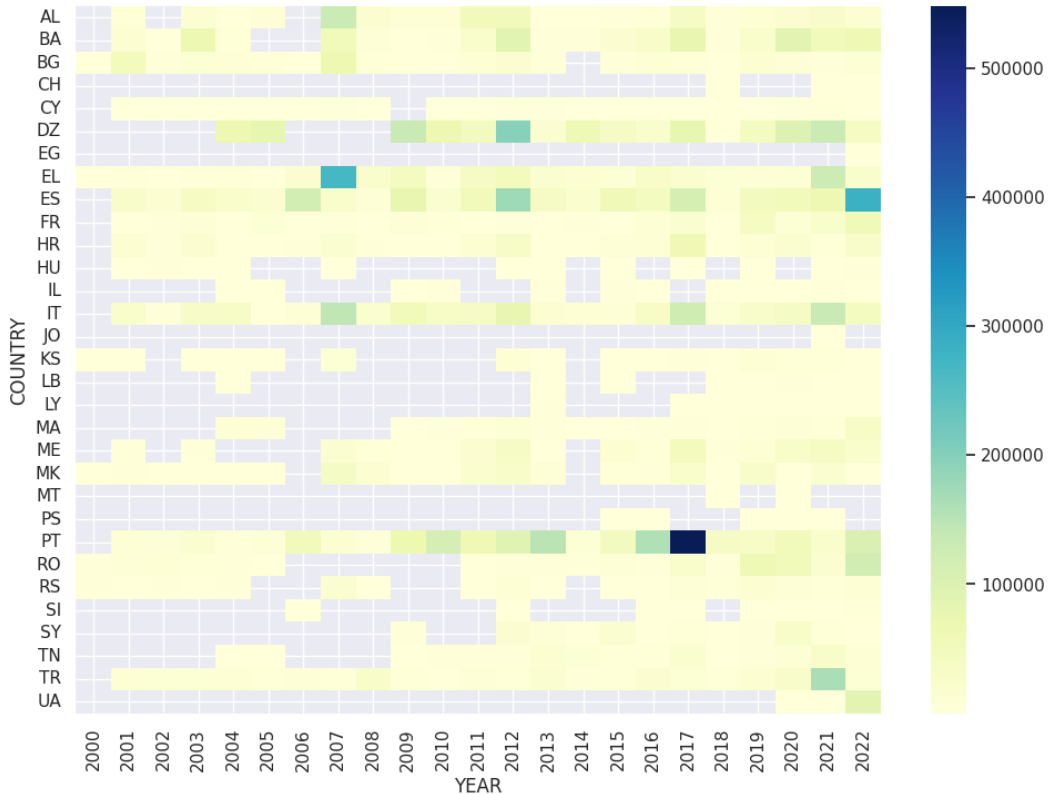

Figure 2: The distribution of the number of fires per country in the burned areas product provided by EFFIS.

47 intention is to append them in the datacube. In the meanwhile, if as more accurate products that refer  
 48 to fires are produced, they can easily be appended to the datacube as separate variables.

49 As also noted in the main text according to the EFFIS website, the start dates of the fires provided  
 50 by EFFIS may not always correspond to the date of ignition of the fire. For this, we make a specific  
 51 post-processing to acquire the first detection of a wildfire, as this is very important in wildfire  
 52 modeling. Despite the improvements achieved through our approach, it is essential to recognize that  
 53 some misalignments in the ignition dates may persist in the datacube.

54 From the multi-purpose dataset Mesogeos, in this work, we extract two ML-ready datasets which  
 55 are created by sampling the original datasets. One tailored to fire danger forecasting and one to final  
 56 burned area prediction. The sampling scheme for the two datasets is analytically presented in the  
 57 main paper. Moreover, the training, validation, test splits are also provided in the main text.

### 58 A.1.3 Collection Process

59 All the data in Mesogeos were collected directly from the data sources in the format originally  
 60 provided by each data source, and a recent crawling was used close to the final date of the datacube,  
 61 September 29, 2022. The collection process for each of the data sources used for Mesogeos was  
 62 different for each product:

- 63 • **ERA5-Land:** The hourly data from ERA5-Land were collected from  
 64 <https://cds.climate.copernicus.eu/cdsapp#!/dataset/reanalysis-era5-land?tab=form> us-  
 65 ing the API request tool provided by the platform. Access to data is based on a principle of  
 66 full, open, and free access (<https://cds.climate.copernicus.eu/api/v2/terms/static/licence-to>

67 use-copernicus-products.pdf). The days and the timespan used was decided to match the  
68 shape of the datacube.

- 69 • **MODIS:** The data from MODIS (day's/night's land surface temperature, NDVI, LAI) were  
70 downloaded from NASA's portal <https://modis.gsfc.nasa.gov/data/> using the official python  
71 script provided for downloading that needs to declare the days, tiles and products that need to  
72 be downloaded. There are no restrictions on the use of data (<https://lpdaac.usgs.gov/data/data-citation-and-policies/>). We downloaded the data covering the temporal and spatial dimen-  
73 sions of the datacube. Specifically, we downloaded tiles h17v04, h18v04, h19v04, h20v04,  
74 h17v05, h18v05, h19v05, and h20v05 for all the years from 2006 to 2022.
- 75 • **European Drought Observatory (EDO):** The soil moisture index  
76 was downloaded by a simple wget command from the EDO website  
77 <https://edo.jrc.ec.europa.eu/gdo/php/index.php?id=2112>. The data are distributed  
78 under a free open access (<https://edo.jrc.ec.europa.eu/gdo/php/index.php?id=2044>). We  
79 downloaded the whole data covering the timespan of the datacube.  
80
- 81 • **European Forest Fire Information System (EFFIS):** The EFFIS data were downloaded  
82 from the real-time updated burnt areas database of the Data and Services tab of the EFFIS  
83 website <https://effis.jrc.ec.europa.eu/applications/data-and-services>. The data are distributed  
84 under the Creative Commons Attribution 4.0 International License. From all the data we  
85 used the data from 2006 til 2022, as these are the data with corrected dates. The previous  
86 years have not been processed yet from the EFFIS, as we noticed that all dates of all the  
87 fires were dated as 01/01/year.
- 88 • **Ignition Points:** The ignition points were downloaded from NASA's FIRMS download  
89 archive <https://firms.modaps.eosdis.nasa.gov/download/create.php> portal by a manual re-  
90 quest for the specific region of interest and timespan. There are no restrictions on the use of  
91 data (<https://lpdaac.usgs.gov/data/data-citation-and-policies/>).
- 92 • **Land Cover:** The land cover data were downloaded from  
93 <https://cds.climate.copernicus.eu/cdsapp#!/dataset/satellite-land-cover?tab=form>  
94 for the years 2006-2022 using the API request tool provided by the plat-  
95 form. Access to data is based on a principle of full, open and free access  
96 [https://cds.climate.copernicus.eu/api/v2/terms/static/licence-to-use-copernicus-](https://cds.climate.copernicus.eu/api/v2/terms/static/licence-to-use-copernicus-products.pdf)  
97 [products.pdf](https://cds.climate.copernicus.eu/api/v2/terms/static/licence-to-use-copernicus-products.pdf).
- 98 • **Worldpop data:** Roads distance and population data were downloaded via wget from  
99 <https://www.worldpop.org> for each country in the datacube's spatial span separately. Then  
100 the data from the separate countries were merged in a single grid using the GDAL  
101 (<https://gdal.org/>) merge command. The data are distributed under the Creative Com-  
102 mons Attribution 4.0 International License. The population data were provided yearly, thus  
103 the data that were downloaded were from 2006 to 2022, while for the road distance product,  
104 there is one single instance.
- 105 • **Digital Elevation Models:** The elevation product was downloaded from COP-  
106 DEM [https://spacedata.copernicus.eu/en/web/guest/collections/copernicus-digital-elevation-](https://spacedata.copernicus.eu/en/web/guest/collections/copernicus-digital-elevation-model)  
107 [model](https://spacedata.copernicus.eu/en/web/guest/collections/copernicus-digital-elevation-model) using a wget script. The product is available under a free license  
108 <https://spacedata.copernicus.eu/collections/copernicus-digital-elevation-model>. Then a post-  
109 process was used to generate slope, aspect, and curvature as described in the next section.  
110 This product is static.

111 It is unknown to the authors of the dataset if any ethical review processes were conducted by the  
112 providers of the datasets.

#### 113 **A.1.4 Pre-processing, Cleaning, Labeling**

114 We store the collected data in an internal machine and post-process them in order to append them in  
115 the 1 km × 1 km × 1 day resolution datacube.

116  
117  
  
118  
119  
120  
121  
122  
123  
124  
125  
  
126  
127  
128  
129  
  
130  
131  
  
132  
133  
134  
  
135  
  
136  
137  
138  
  
139  
140  
141  
142  
  
143  
144  
145  
146  
147  
148  
149  
150  
  
151  
152  
153  
154  
155  
156  
157  
158  
159  
160  
161  
162  
163  
164

- **ERA5-Land Data.** We combine 2 m dewpoint temperature (DT) and 2 m temperature (T), to calculate relative humidity using the following equation:

$$100 * \frac{\exp \frac{17.625 * DT}{243.04 + DT}}{\exp \frac{17.625 * T}{243.04 + T}} \quad (1)$$

We also combine 10 m wind *u*-component and 10 m wind *v*-component to compute wind speed and direction. Then, we calculate the maximum daily value of 2 m temperature, 2 m dewpoint temperature, and surface pressure, the minimum daily value of relative humidity, the mean value of the surface solar radiation downwards, and the day’s total precipitation. All these are calculated based on the hourly values of the day. For the wind, we calculate daily values of maximum wind speed. The daily wind speed direction is calculated at the hour that the maximum wind speed occurs. Finally, we use linear interpolation to map the 9 km spatial resolution to the 1 km spatial resolution of the datacube.

- **LAI, NDVI.** We concatenate the separate tiles downloaded from MODIS and we use the nearest interpolation to map these variables to 1 km spatial resolution. Moreover, as the time resolution of the products is 8 and 16 days, we forward-fill the values in time, to fill the temporal gaps and let the variables have a daily temporal resolution.
- **Day and Night Land Surface Temperature.** No pre-processing was conducted for these products.
- **Soil Moisture Index.** We reproject this variable in EPSG:4326 and we use the nearest interpolation to map it to 1 km spatial resolution. As the temporal resolution of the variables is 10 days, we also forward-fill it in time, to fill the temporal gaps.
- **Roads Distance** is a static variable that has no time dimension. No pre-processing is needed.
- **Yearly population density.** We collect each year’s population density covering the years 2006-2020. As the years 2021, and 2022 are not available, we use the year’s 2020 value as a proxy for them.
- **Elevation, Slope, Aspect, Curvature.** After gathering the elevation, we upscale it to a 1 km spatial resolution by using mean aggregation. After having the 1 km spatially resolved elevation at hand, we calculate slope, aspect, and curvature at 1 km spatial resolution, using GDAL <https://gdal.org/>.
- **Land Cover.** The land cover product comes in 300 m spatial resolution. In order to take a 1 km spatial resolution product, we create 8 variables, each one related to the fraction of one out of 8 classes of interest, which are based on the following subclasses: agriculture, forest, grassland, settlements, shrubland, sparse vegetation, water bodies, wetland. For this, we calculate the percentage of each subclass in the 1km pixel of interest. Thus, in each 1 km spatially resolved cell, each of these 8 variables has a value between 0 and 1, which represents the fraction of the class presence in the pixel. We repeat this process for all the years.
- **Burned Areas & Ignition Points.** The gathered shapefiles representing final burned areas, produced by different ignitions need some pre-processing to identify the date of the ignition of the fire and to combine several burned areas, that are produced by the same fire event, into one. To this end, we associate burned area products with the product of active fires. In order to identify the date of the ignition, we create a 1 km buffer around the burned area shapefiles and we look for an active fire inside this area that has been produced within a week’s temporal buffer from the date that EFFIS provides for the burned area. Moreover, to combine several burned areas into one, we also use a buffer of 1 km and we do the following: We use as an anchor a burned area and we calculate its ignition point following the procedure above. If this ignition point is also lying inside buffered burned areas other than the anchor one and these burned areas have a date within a week before the anchor one, we consider that they belong to the same event as the anchor one. Having the ignition points and burned areas at hand, we rasterize them in the same 1 km spatial grid of all the input variables. Each ignition point also holds the burned area size of the fire.

165 The final datacube has 29 variables.

166 We shift backward the variables related to fire events (burned areas, ignition points). Moreover, we  
167 also shift backward the meteorological data, as we assume that will be available through forecasts for  
168 the day of interest.

### 169 **A.1.5 Uses**

170 The dataset has already been used for two tasks: 1) next day’s wildfire danger forecasting and 2)  
171 final burned area prediction, given the fire ignition. The two tasks are analytically described in the  
172 main text. The code for extracting the relative datasets and running the models is provided here:  
173 <https://github.com/Orion-AI-Lab/mesogeos>. Moreover, alternative tracks for which the dataset can be  
174 used are also presented in the main text. Some examples are final burned area size prediction, extreme  
175 events forecasting, self-supervised learning techniques, wildfire susceptibility mapping, modeling on  
176 different spatial and temporal scales, and causality or explainable AI methods.

### 177 **A.1.6 Distribution**

178 The Mesogeos dataset is based on open datasets. We openly publish the Mesogeos datacube, the  
179 derived datasets and models, and the code used to generate them at <https://zenodo.org/record/7741518>  
180 under DOI: 10.5281/zenodo.7473331 and with a Creative Commons Attribution 4.0 International  
181 License. Any work using the Mesogeos dataset should cite the main paper and the individual  
182 dataset sources that have been used and listed in Table 1. We also provide a github reposi-  
183 tory: <https://github.com/Orion-AI-Lab/mesogeos> and a website for the project: [https://orion-ai-  
184 lab.github.io/mesogeos/](https://orion-ai-lab.github.io/mesogeos/) with information on how to use the data and code.

### 185 **A.1.7 Maintenance**

186 The dataset will be maintained by Spyros Kondylatos and Ioannis Prapas. If needed, the emails for  
187 contacting are [skondylatos@noa.gr](mailto:skondylatos@noa.gr), and [iprapas@noa.gr](mailto:iprapas@noa.gr). The dataset may be updated if needed (with  
188 the inclusion of more years when the data are available, more layers for more applications, or more  
189 fire data sets). The updates will be ad-hoc and will not be periodical. Each time the dataset will be  
190 updated, there will be a new GitHub code release and a new version in Zenodo. The older versions of  
191 the datacube will not be maintained. For contributing with new ML-ready datasets there are analytical  
192 instructions in the GitHub repository <https://github.com/Orion-AI-Lab/mesogeos> in the Contributing  
193 section.

### 194 **A.1.8 Author statement**

195 The authors of this scientific paper bear full responsibility for any violation of rights that may arise  
196 from the collection of the data included in this research.

## 197 **A.2 Models Details**

### 198 **A.2.1 Track A: Next Day’s Wildfire Danger Forecasting**

199 Long Short-term Memory (LSTM), Transformer, and Gated Transformer are the models used for  
200 Track A. All the hyperparameters included in this section were defined using the best-performing  
201 model in the validation set. All the models were trained for 30 epochs with the binary cross-entropy  
202 loss with  $\ell_2$ -norm regularization, the Adam optimizer, and a batch size of 256. The data were  
203 normalized before serving as input. We filled with the temporal aggregate of the time series the nulls  
204 existing in the inputs of the models. When the value was still null, we were filling it with 0, which is  
205 the mean of each variable, after being normalized.

206 Regarding LSTM’s architecture, a normalization layer is followed by an LSTM layer with 128  
207 neurons, which is followed by two linear hidden layers with 128 and 64 neurons, respectively, and  
208 an output 2-class softmax layer. The final model is trained with a 0.0063 weight decay and 0.004

209 learning rate, which is divided by 10 every 15 epochs. All linear layers, but the last, are followed by a  
210 dropout with probability  $p = 0.5$  and the ReLU activation function.

211 Regarding Transformer’s architecture, the time-series input is passed through a linear layer with 256  
212 neurons and then through a standard positional encoding layer. Then, it is followed by 2 standard  
213 Transformer Encoder Layers which are made up of self-attention and feed-forward layers. The  
214 number of heads in each layer is 2 and the neurons in each feed-forward layer are 512. The final  
215 layer is a 2-class softmax layer. The final model is trained with a 0.0018 weight decay and 0.00029  
216 learning rate, which is divided by 10 every 15 epochs.

217 Regarding Gated Transformer’s architecture, for the time-Transformer block, the original time-series  
218 input is passed through a linear layer with 256 neurons and then through a standard positional  
219 encoding layer. This is followed by 4 standard Transformer Encoder Layers which are made up of  
220 self-attention and feed-forward layers. The number of heads in each layer is 4 and the neurons in each  
221 feed-forward layer are 512. Regarding the channel-Transformer block, following the original paper,  
222 the time-series input is transposed in order for the attention to act in the dimension of the variables.  
223 The input is then passed through 4 Transformer Encoder Layers with the same parameters as the  
224 time one. The outputs of the two Transformers blocks are then concatenated and passed through a  
225 softmax layer. The first logit of the softmax is multiplied with the outputs of time-Transformer and  
226 the second by the output of the channel-Transformer. The final outputs are concatenated and pass  
227 through the final 2-class softmax layer. The final model is trained with a 0.0045 weight decay and  
228 0.00012 learning rate, which is divided by 10 every 15 epochs.

229 All the models were trained in a system with 2 GPUs (NVIDIA GeForce RTX 3080), each one having  
230 a memory of 10 GB. The total RAM of the system is 128GB and it also has 48 CPUs. The models  
231 were trained using one of the GPUs.

232 All models were developed using the PyTorch library [2]

### 233 A.2.2 Track B: Final Burned Area Prediction

234 For track B, the U-Net was employed.

235 A standard U-Net model was used with an EfficientNet-B1 Encoder, using Pytorch [2], Pytorch  
236 Lightning [3] and the segmentations\_model\_pytorch library [4]. The model was trained for a  
237 maximum of 50 epochs, using early stopping, with the binary cross-entropy loss with  $\ell_2$ -norm  
238 regularization, the Adam optimizer, and a batch size of 128. The standard U-Net architecture was  
239 used with no modifications. The final model is trained with a 0.000001 weight decay and 0.005  
240 learning rate. The data are scaled with the minimum and maximum values in the range [0, 1] before  
241 being served as inputs to the model. We fill the nulls with -1. The model was trained in a system with  
242 2 GPUs (NVIDIA GeForce RTX 3090), each one having a memory of 24 GB. The total RAM of the  
243 system is 128GB and it also has 32 CPUs. The models were trained using one of the GPUs.

## 244 References

- 245 [1] Timnit Gebre, Jamie Morgenstern, Briana Vecchione, Jennifer Wortman Vaughan, Hanna Wallach,  
246 Hal Daumé III, and Kate Crawford. Datasheets for Datasets, December 2021. URL <http://arxiv.org/abs/1803.09010>. arXiv:1803.09010 [cs].
- 248 [2] Adam Paszke, Sam Gross, Francisco Massa, Adam Lerer, James Bradbury, Gregory Chanan,  
249 Trevor Killeen, Zeming Lin, Natalia Gimelshein, Luca Antiga, Alban Desmaison, Andreas  
250 Kopf, Edward Yang, Zachary DeVito, Martin Raison, Alykhan Tejani, Sasank Chilamkurthy,  
251 Benoit Steiner, Lu Fang, Junjie Bai, and Soumith Chintala. Pytorch: An imperative style, high-  
252 performance deep learning library. In H. Wallach, H. Larochelle, A. Beygelzimer, F. d’Alché-Buc,  
253 E. Fox, and R. Garnett, editors, *Advances in Neural Information Processing Systems 32*, pages  
254 8024–8035. Curran Associates, Inc., 2019. URL [http://papers.neurips.cc/paper/  
255 9015-pytorch-an-imperative-style-high-performance-deep-learning-library.  
256 pdf](http://papers.neurips.cc/paper/9015-pytorch-an-imperative-style-high-performance-deep-learning-library.pdf).

- 257 [3] William Falcon et al. Pytorch lightning. *GitHub. Note:*  
258 <https://github.com/PyTorchLightning/pytorch-lightning>, 3, 2019.
- 259 [4] Pavel Iakubovskii. Segmentation models pytorch. [https://github.com/qubvel/](https://github.com/qubvel/segmentation_models.pytorch)  
260 [segmentation\\_models.pytorch](https://github.com/qubvel/segmentation_models.pytorch), 2019.
